# Supplementary material for: Discovery of lipid profiles in plasma‐derived extracellular vesicles as biomarkers for breast cancer diagnosis
Source: PubMed Central journal article supplement — Cancer Sci. 2023 Aug 22;114(10):4020–31. doi: 10.1111/cas.15935 (PMC10551607; doi:10.1111/cas.15935), 2023-08-22
Supplement: CAS-114-4020-s001.pdf [file CAS-114-4020-s001.pdf]

# Supplementary figure 3

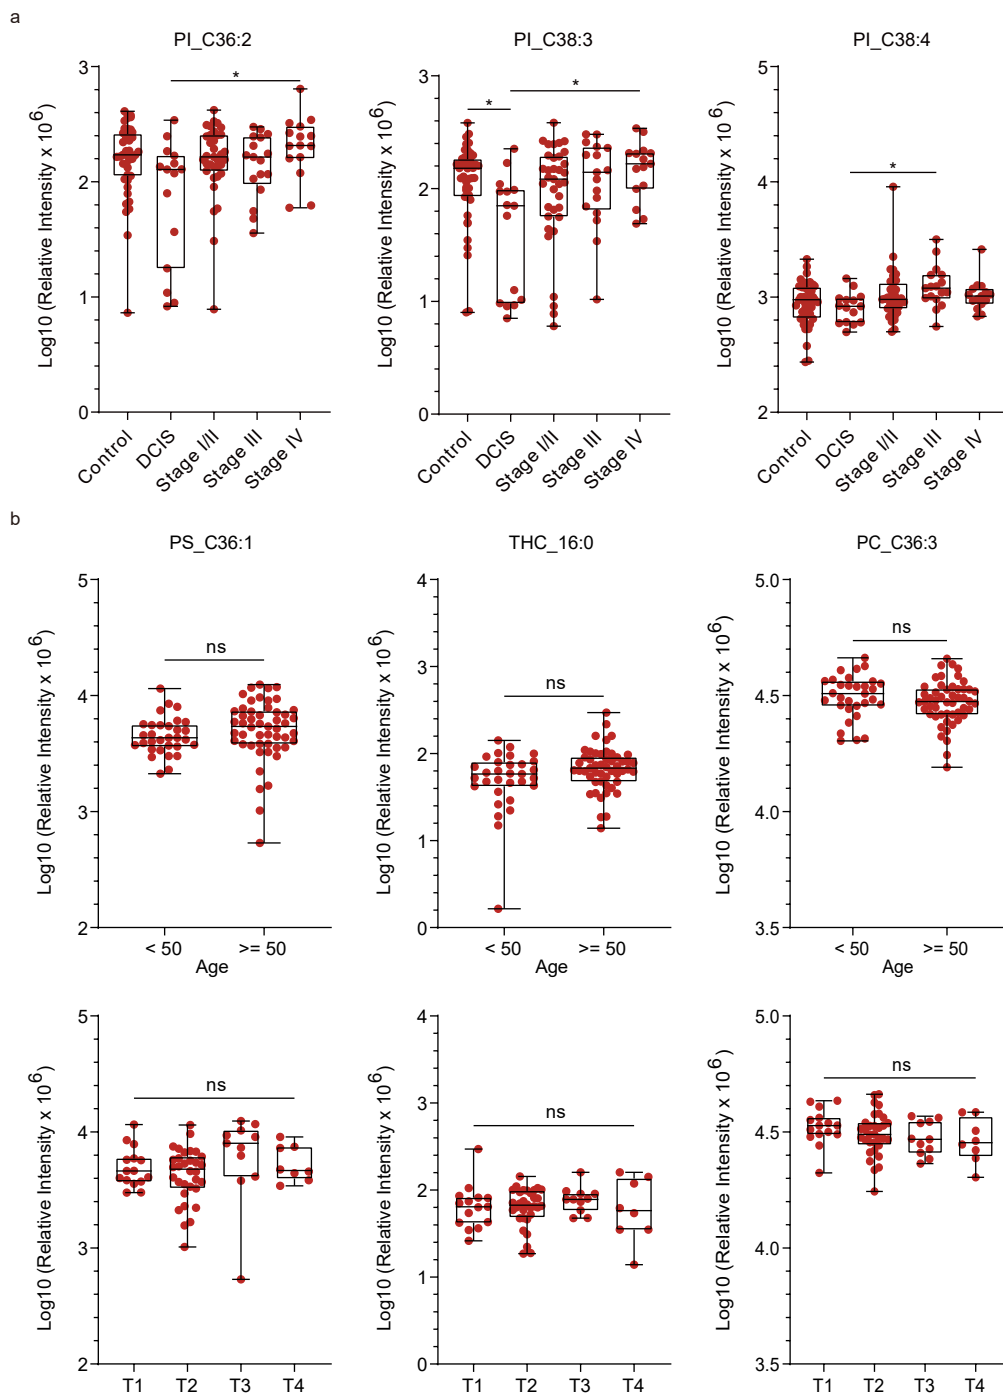

Fig. S3. (a) Boxplots of three polyunsaturated phosphatidylinositols (PIs), concentrations of PI\_C36:2, PI\_C38:3, PI\_C38:4 in control, DCIS, Stage I/II, Stage III, Stage IV samples of cohort 1. (b) Boxplots of the three lipids that constitute the diagnostic model, concentrations of PS\_C36:1, THC\_16:0, and PC\_C36:3, across ages and T1–4 stages in the population with cancer of cohort 1. The box range represents the interquartile range (IQR), and the median is indicated by a line across the box. ns, not significant. \*,  $p < 0.05$ ; \*\*,  $p < 0.01$ ; \*\*\*,  $p < 0.001$ ; \*\*\*\*,  $p < 0.0001$ .
