# Supplementary material for: Discovery of lipid profiles in plasma‐derived extracellular vesicles as biomarkers for breast cancer diagnosis
Source: PubMed Central journal article supplement — Cancer Sci. 2023 Aug 22;114(10):4020–31. doi: 10.1111/cas.15935 (PMC10551607; doi:10.1111/cas.15935), 2023-08-22
Supplement: CAS-114-4020-s003.pdf [file CAS-114-4020-s003.pdf]

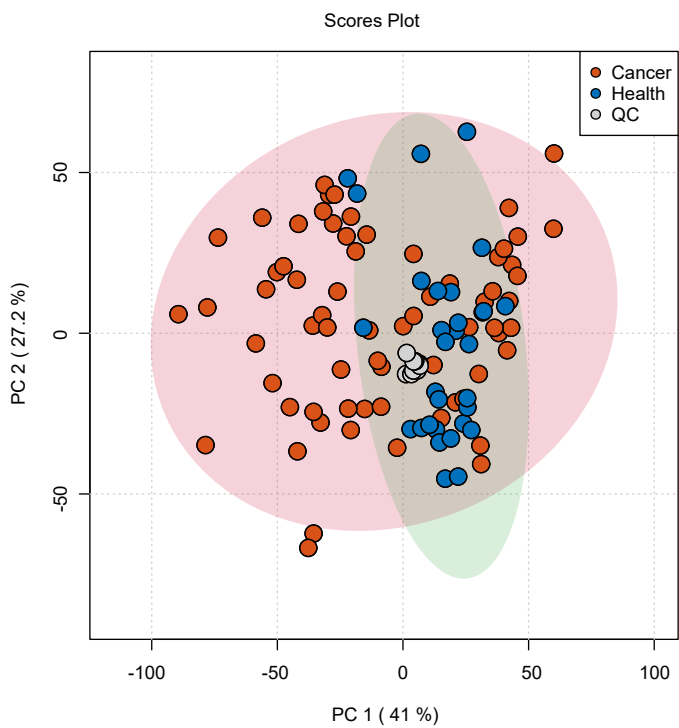

Fig. S5. Unsupervised principal component analysis (PCA) plot of lipids in cohort 2 with quality control (QC) samples. LC/MS measurements were triplicates per sample. Each plot represents one measurement.
