# Supplementary material for: Discovery of lipid profiles in plasma‐derived extracellular vesicles as biomarkers for breast cancer diagnosis
Source: PubMed Central journal article supplement — Cancer Sci. 2023 Aug 22;114(10):4020–31. doi: 10.1111/cas.15935 (PMC10551607; doi:10.1111/cas.15935), 2023-08-22
Supplement: CAS-114-4020-s006.pdf [file CAS-114-4020-s006.pdf]

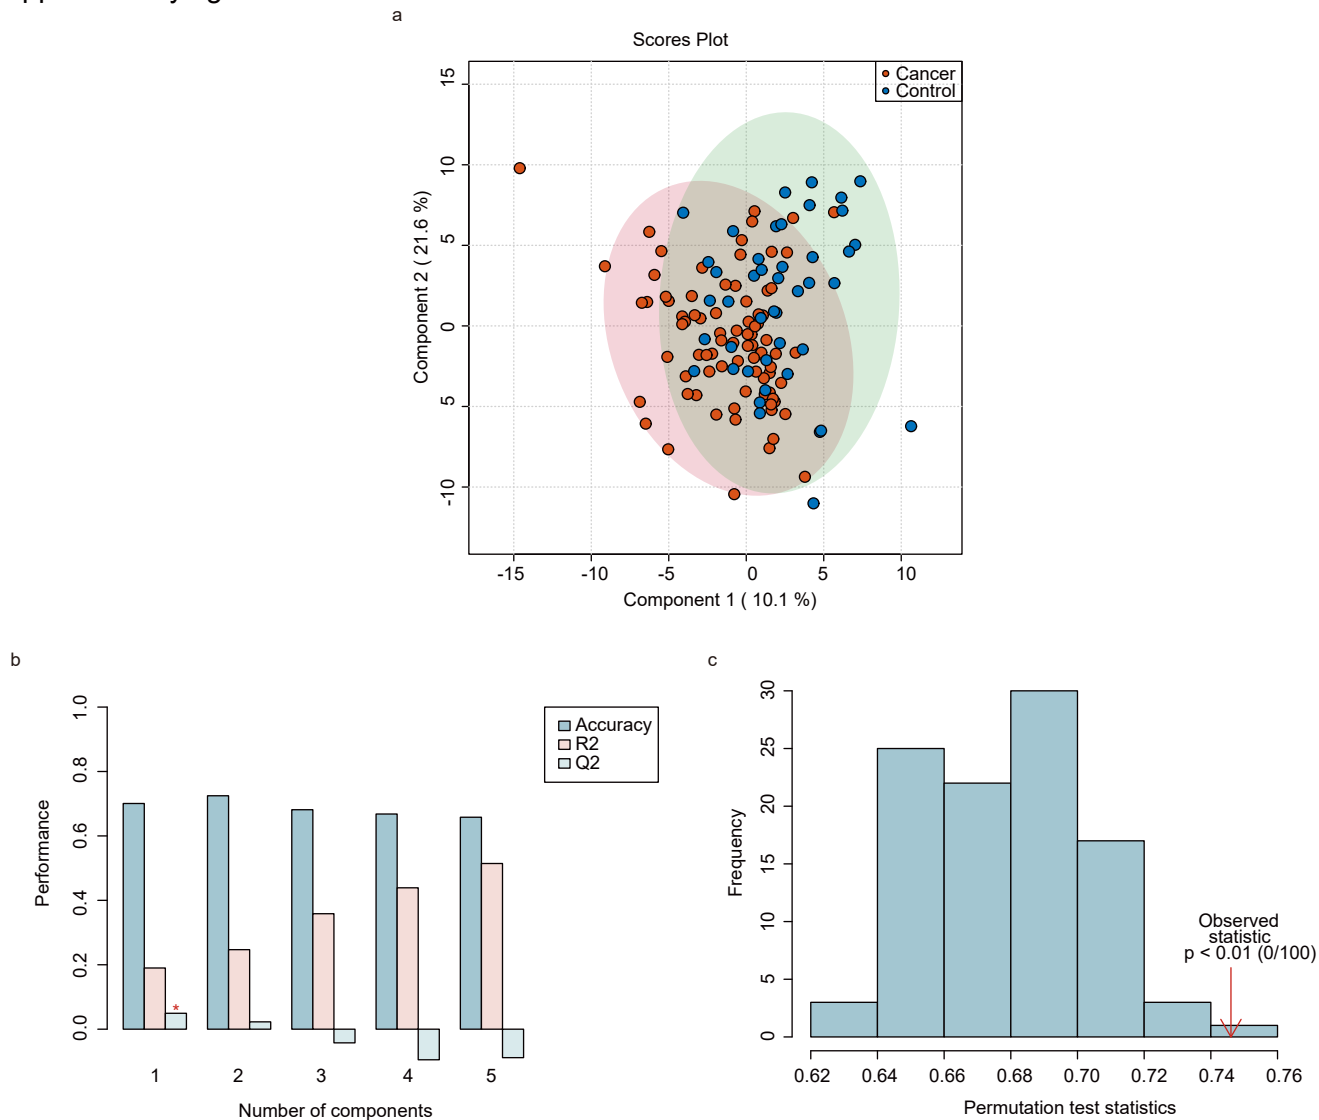

Fig. S2. (a) Score plot of the supervised partial least squares discriminant analysis (PLS-DA) in control and BC samples of cohort 1. x- and y-axes indicate the first and the second PLS-DA component. Each plot corresponds to one sample after averaging the concentration of each lipid in repeated measurements. (b) Partial least squares discriminant analysis (PLS-DA) classification using different numbers of components. The red star indicates the best classifier by 10-fold cross-validation. (c) Partial least squares discriminant analysis (PLS-DA) model validation by permutation tests of prediction accuracy showed that it was not overfitting. The p-value based on permutation is  $p < 0.01$  (0/100).
