# Supplementary material for: Discovery of lipid profiles in plasma‐derived extracellular vesicles as biomarkers for breast cancer diagnosis
Source: PubMed Central journal article supplement — Cancer Sci. 2023 Aug 22;114(10):4020–31. doi: 10.1111/cas.15935 (PMC10551607; doi:10.1111/cas.15935), 2023-08-22
Supplement: CAS-114-4020-s009.pdf [file CAS-114-4020-s009.pdf]

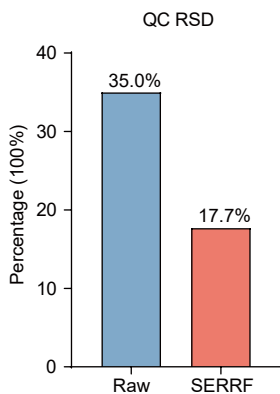

Fig. S1. Histogram result of systematic error removal using random forest (SERRF) to normalize systematic errors in cohort 1. Median averages of 5-fold Monte-Carlo cross-validation quality control (QC) relative standard deviation (RSD) reduced from 35.0% to 17.7%.
