# Supplementary material for: Discovery of lipid profiles in plasma‐derived extracellular vesicles as biomarkers for breast cancer diagnosis
Source: PubMed Central journal article supplement — Cancer Sci. 2023 Aug 22;114(10):4020–31. doi: 10.1111/cas.15935 (PMC10551607; doi:10.1111/cas.15935), 2023-08-22
Supplement: CAS-114-4020-s011.pdf [file CAS-114-4020-s011.pdf]

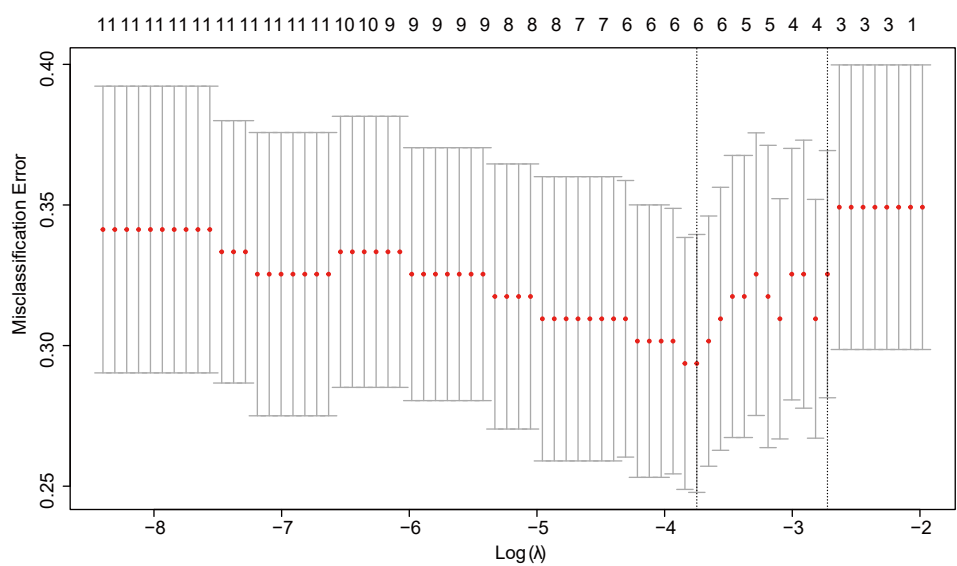

Fig. S4. Least absolute shrinkage and selection operator (LASSO) regression analysis with 10-fold cross-validation was repeated 25 times to select lipid biomarkers. This figure is a typical illustration representing the result of the last run of 25 repetitions.
